# Supplementary material
Source: Springer Nature journal article supplement (https://www.springermedizin.de/resource/supplementary/12946_2011_147_MOESM2_ESM.pdf/9555262)

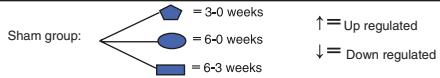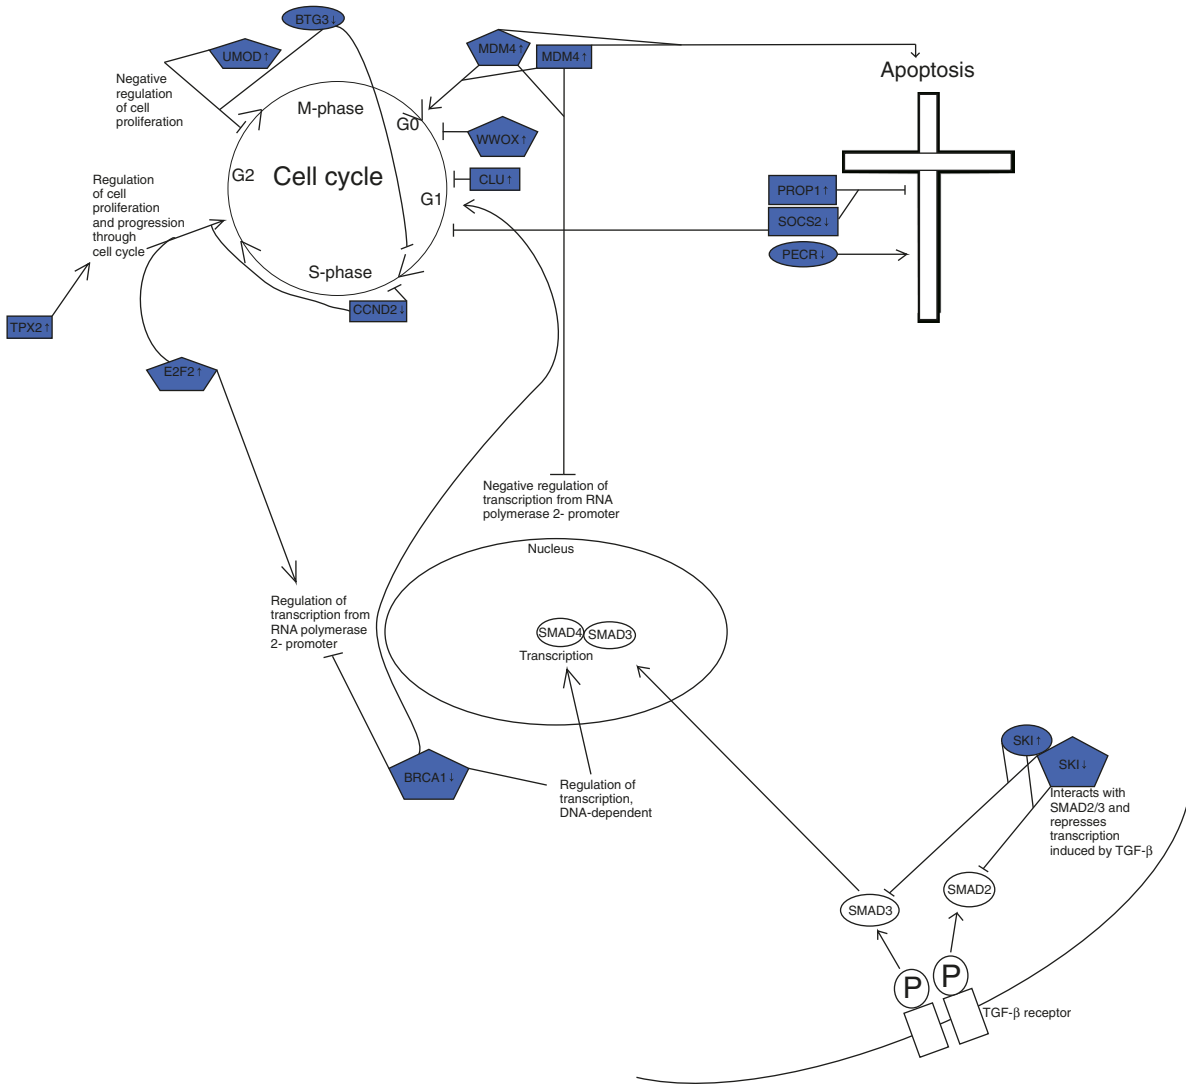

Supplement: MOESM2 [file 9555262]
